# Supplementary material for: IFN-γ Induces PD-L1 Expression in Primed Human Basophils
Source: MDPI journal article supplement (doi:10.3390/cells11050801), 2022-02-25
Supplement: s1 [file s1]

## Article

# IFN- $\gamma$ Induces PD-L1 Expression in Primed Human Basophils

Srinivasa Reddy Bonam <sup>1</sup>, Camille Chauvin <sup>1</sup>, Mano J. Mathew <sup>2</sup>, and Jagadeesh Bayry <sup>1,3,\*</sup><sup>1</sup> Institut National de la Santé et de la Recherche Médicale, Centre de Recherche des Cordeliers, Sorbonne Université, Université de Paris, 75006 Paris, France.<sup>2</sup> EFREL, Villejuif, 94800, France<sup>3</sup> Department of Biological Sciences & Engineering, Indian Institute of Technology Palakkad, Palakkad, 678623, India.

\* Correspondence: Jagadeesh.bayry@crc.jussieu.fr or bayry@iitpkd.ac.in

**Citation:** IFN- $\gamma$  Induces PD-L1 Expression in Primed Human Basophils. *Cells* 2022, 11, 801. <https://doi.org/10.3390/cells11050801>

Academic Editor(s):

Received: date

Accepted: date

Published: date

**Publisher's Note:** MDPI stays neutral with regard to jurisdictional claims in published maps and institutional affiliations.

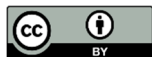

**Copyright:** © 2022 by the authors. Submitted for possible open access publication under the terms and conditions of the Creative Commons Attribution (CC BY) license (<https://creativecommons.org/licenses/by/4.0/>).

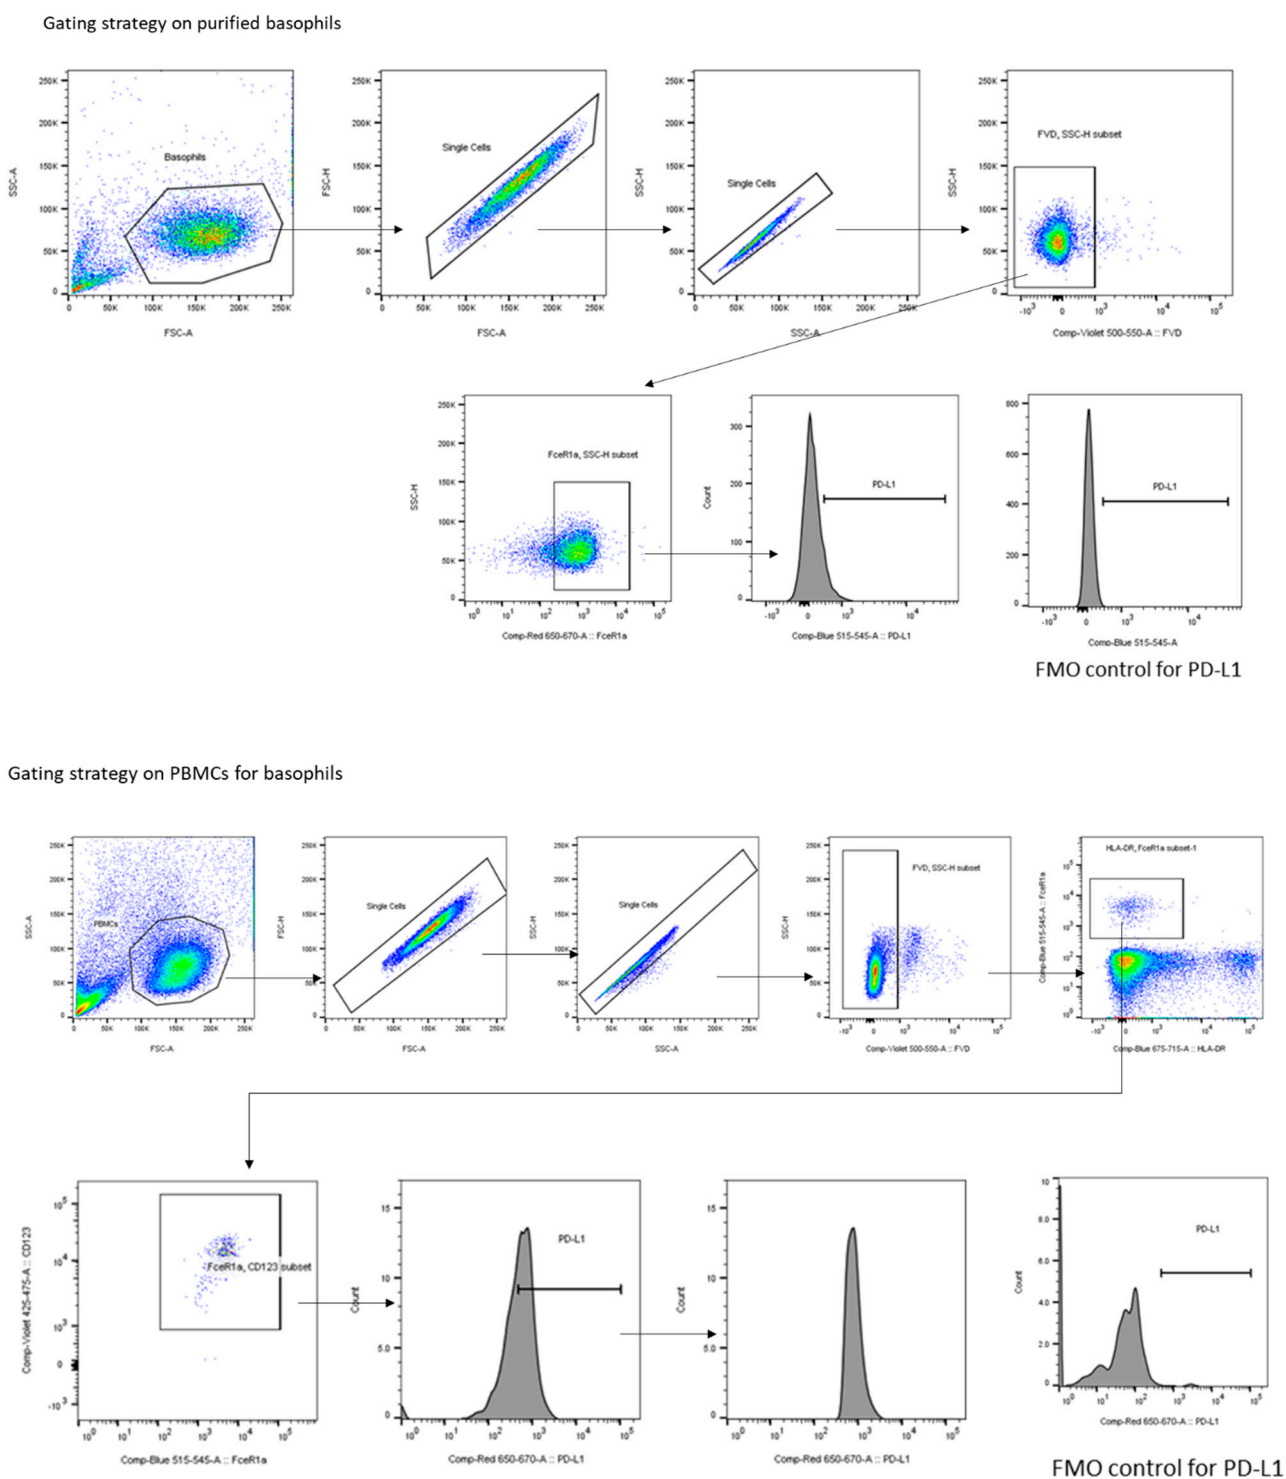

**Figure S1.** Flow cytometry gating strategy for the purified basophils (upper panels) and peripheral blood mononuclear cells containing basophils (lower panels).

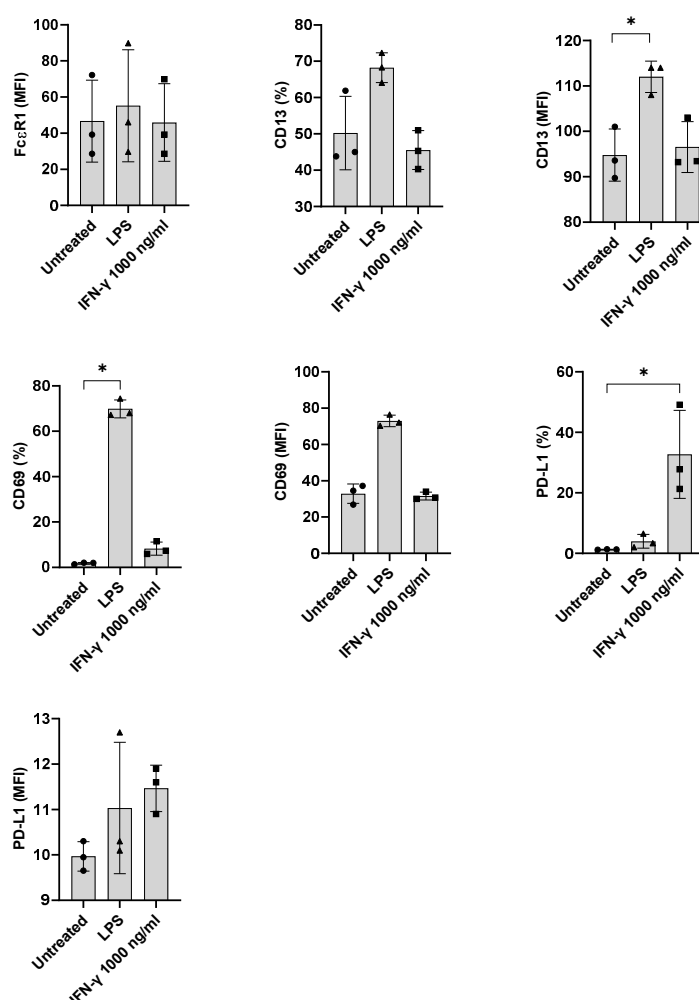

**Figure S2.** Prolonged stimulatory effect of IFN- $\gamma$  on PD-L1 and other surface markers of untouched basophils. Basophil-containing PBMCs ( $1 \times 10^6$  cells/ml/24-well plate) of healthy donors were cultured with or without IFN- $\gamma$  for measuring different parameters. PBMCs were cultured either without (untreated) or with LPS (100 ng/ml) or with IFN- $\gamma$  (1000 ng/ml) for 48 h. After incubation, PD-L1 expression (% positive cells and median fluorescence intensities (MFI), mean  $\pm$  SD;  $n = 3$  independent donors from two independent experiments) was evaluated by flow cytometry. \* $P < 0.05$ , one-way ANOVA Friedman test with Dunn's multiple comparisons post-test.

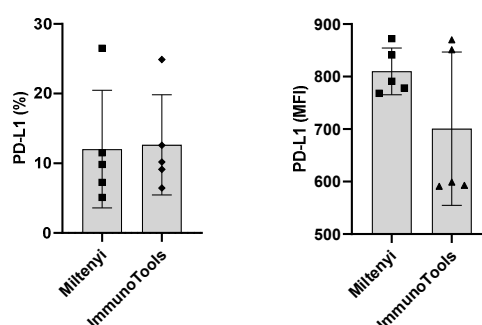

**Figure S3.** The effect of IFN- $\gamma$  from different sources on PD-L1 expression in human basophils. Basophils ( $0.1 \times 10^6$  cells/200  $\mu$ l/96-well plate) isolated from PBMCs of healthy donors were cultured with IFN- $\gamma$  at 1000 ng/ml. Basophil phenotype was evaluated by flow cytometry after 24 h. Expression of PD-L1 on basophils (% positive cells and median fluorescence intensities (MFI), mean  $\pm$  SD;  $n = 5$  independent donors from three independent experiments) was represented.

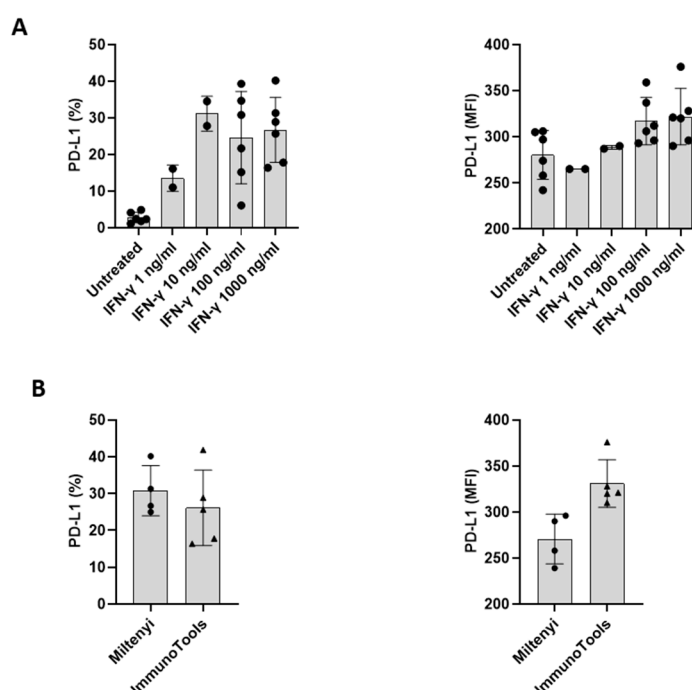

**Figure S4.** The influence of dose and source of IFN- $\gamma$  towards PD-L1 expression in untouched basophils. Basophil-containing PBMCs ( $1 \times 10^6$  cells/ml/24-well plate) of healthy donors were cultured with or without IFN- $\gamma$  for measuring different parameters. (A) PBMCs were cultured either without (untreated) or with IFN- $\gamma$  at 1–1000 ng/ml for 24 h. After incubation, PD-L1 expression (% positive cells and median fluorescence intensities (MFI), mean  $\pm$  SD; n = 2–6 independent donors from two or three independent experiments) was evaluated by flow cytometry. (B) PBMCs were treated with IFN- $\gamma$  at 1000 ng/ml, from different sources, for 24 h. Expression of PD-L1 on basophils (% positive cells and median fluorescence intensities (MFI), mean  $\pm$  SD; n = 4 independent donors from two independent experiments) was presented.

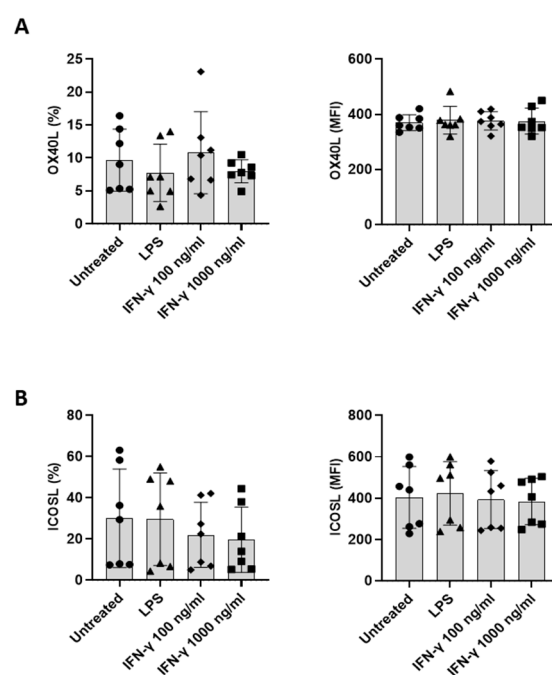

**Figure S5.** The effect of IFN- $\gamma$  on OX40L and ICOSL expression in basophils from untouched PBMCs. Basophil-containing PBMCs ( $1 \times 10^6$  cells/ml/24-well plate) from the healthy donors were cultured with or without IFN- $\gamma$  at 100 ng/ml and 1000 ng/ml or LPS at 100 ng/ml for 24 h. After incubation, cells phenotype was evaluated by flow cytometry. Expression of OX40L (A) and ICOSL (B) on the basophils (% positive cells and median fluorescence intensities (MFI), mean  $\pm$  SD; n = 7 independent donors with three independent experiments) are presented.
